# Supplementary material
Source: publisher figshare collection journal article supplement (https://osapublishing.figshare.com/ndownloader/files/13648496)
Supplement: Supplementary file 1 [file 13648496]

#Comment1: Non-resonant background (NRB) corresponds to I1
#Comment2: Collagen of bone
Wavelength [nm]	Intensity [a.u.]
731.64423	4.2
731.7005	6.2
731.75677	6.251428571
731.81305	6.491280148
731.86932	6.715440115
731.9256	6.996930342
731.98187	7.258941059
732.03809	7.491082251
732.09436	7.713521772
732.15063	7.883390294
732.20691	7.97414966
732.26312	8.072840203
732.3194	8.157922078
732.37561	8.236459836
732.43188	8.309807434
732.4881	8.342019271
732.54431	8.35545061
732.60059	8.39851577
732.6568	8.407441207
732.71301	8.416849817
732.76923	8.430662021
732.8255	8.455874358
732.88171	8.473997114
732.93793	8.489416966
732.99414	8.538086403
733.05035	8.65496952
733.10651	8.696156904
733.16272	8.765173602
733.21893	8.844526902
733.27515	8.92096475
733.33136	8.992207792
733.38751	9.053432282
733.44373	9.124675325
733.49988	9.168089054
733.55609	9.18812616
733.61224	9.21038961
733.66846	9.219294991
733.72461	9.233766234
733.78082	9.25380334
733.83698	9.260482375
733.89313	9.263821892
733.94928	9.263821892
734.00543	9.2716141
734.06165	9.279406308
734.1178	9.298330241
734.17395	9.336178108
734.2301	9.369573284
734.28625	9.417439703
734.34235	9.451948052
734.3985	9.483116883
734.45465	9.507606679
734.5108	9.541001855
734.56689	9.573283859
734.62305	9.594434137
734.6792	9.637847866
734.73529	9.682374768
734.79144	9.730241187
734.84753	9.774768089
734.90363	9.809276438
734.95978	9.854916512
735.01587	9.913914657
735.07196	9.98961039
735.12811	10.05306122
735.1842	10.1187384
735.2403	10.1877551
735.29639	10.2445269
735.35248	10.31243043
735.40857	10.37254174
735.46466	10.43487941
735.52075	10.4961039
735.57678	10.56178108
735.63287	10.60185529
735.68896	10.62300557
735.74506	10.65194805
735.80109	10.6742115
735.85718	10.70092764
735.91321	10.7109462
735.9693	10.71205937
736.02533	10.71205937
736.08142	10.70315399
736.13745	10.69981447
736.19348	10.6864564
736.24957	10.68756957
736.3056	10.70871985
736.36163	10.72541744
736.41766	10.74656772
736.47369	10.75102041
736.52972	10.75992579
736.58575	10.77105751
736.64178	10.79443414
736.69781	10.82115028
736.75385	10.84786642
736.80988	10.8812616
736.86584	10.92133581
736.92188	10.94805195
736.97791	10.97922078
737.03387	11.00037106
737.0899	11.0393321
737.14587	11.07717996
737.2019	11.1038961
737.25787	11.1283859
737.31384	11.1528757
737.36987	11.17402597
737.42584	11.18070501
737.48181	11.18181818
737.53778	11.18627087
737.59375	11.18181818
737.64972	11.18181818
737.70569	11.17736549
737.76166	11.17179963
737.81763	11.1729128
737.8736	11.17847866
737.92957	11.17179963
737.98553	11.15844156
738.04144	11.14842301
738.09741	11.13172542
738.15338	11.12170686
738.20929	11.1283859
738.26526	11.14842301
738.32117	11.17513915
738.37714	11.20853432
738.43304	11.24860853
738.48895	11.27087199
738.54486	11.30204082
738.60083	11.33988868
738.65674	11.39220779
738.71265	11.44786642
738.76855	11.50575139
738.82446	11.56586271
738.88037	11.61929499
738.93628	11.67050093
738.99219	11.72727273
739.0481	11.77179963
739.10394	11.83079777
739.15985	11.89424861
739.21576	11.95769944
739.27167	12.00890538
739.32751	12.06233766
739.38342	12.09795918
739.43927	12.12912801
739.49518	12.16363636
739.55103	12.19814471
739.60687	12.22374768
739.66278	12.24935065
739.71863	12.26827458
739.77448	12.28719852
739.83032	12.29721707
739.88617	12.31057514
739.94202	12.33729128
739.99786	12.36400742
740.05371	12.39072356
740.10956	12.41187384
740.16541	12.43525046
740.22125	12.47198516
740.27704	12.51205937
740.33289	12.55769944
740.38873	12.59666048
740.44452	12.63784787
740.50037	12.67792208
740.55615	12.70575139
740.612	12.74248609
740.66779	12.78478664
740.72363	12.8393321
740.77942	12.89276438
740.83521	12.93506494
740.89099	12.97402597
740.94684	12.9974026
741.00262	13.01632653
741.05841	13.02745826
741.1142	13.03970315
741.16998	13.04638219
741.22571	13.06085343
741.28149	13.06641929
741.33728	13.06085343
741.39307	13.0541744
741.44885	13.04860853
741.50458	13.04526902
741.56036	13.05306122
741.61609	13.06307978
741.67188	13.08423006
741.7276	13.11651206
741.78339	13.16103896
741.83911	13.20779221
741.89484	13.26233766
741.95062	13.32912801
742.00635	13.40927644
742.06207	13.47606679
742.1178	13.5528757
742.17352	13.63747681
742.22925	13.71428571
742.28497	13.77439703
742.3407	13.82115028
742.39642	13.8690167
742.45215	13.91020408
742.50781	13.9458256
742.56354	13.98589981
742.61926	14.02820037
742.67493	14.083859
742.73065	14.14397032
742.78632	14.19517625
742.84204	14.26419295
742.89771	14.3432282
742.95337	14.42337662
743.00909	14.50352505
743.06476	14.58923933
743.12042	14.66604824
743.17609	14.73172542
743.23175	14.79294991
743.28741	14.85194805
743.34308	14.90426716
743.39874	14.9554731
743.45441	15.00667904
743.51007	15.05899814
743.56573	15.11799629
743.6214	15.16920223
743.677	15.22152134
743.73267	15.283859
743.78827	15.35510204
743.84393	15.41187384
743.89954	15.47866419
743.9552	15.54434137
744.0108	15.62226345
744.06647	15.69907236
744.12207	15.78478664
744.17767	15.87606679
744.23328	15.96957328
744.28888	16.05306122
744.34448	16.14100186
744.40009	16.22671614
744.45569	16.31243043
744.51129	16.40037106
744.56689	16.48163265
744.6225	16.55176252
744.6781	16.61410019
744.73364	16.6742115
744.78925	16.73877551
744.84485	16.81113173
744.90039	16.87124304
744.95599	16.93358071
745.01154	16.99146568
745.06714	17.06270872
745.12268	17.13283859
745.17822	17.2174397
745.23376	17.31539889
745.28937	17.40779221
745.34491	17.49795918
745.40045	17.57810761
745.45599	17.65380334
745.51154	17.74842301
745.56708	17.83747681
745.62262	17.92875696
745.67816	18.01113173
745.73364	18.09128015
745.78918	18.16141002
745.84473	18.23153989
745.90021	18.31502783
745.95575	18.39183673
746.01123	18.47643785
746.06677	18.56549165
746.12225	18.67346939
746.1778	18.77588126
746.23328	18.88051948
746.28876	18.98627087
746.34424	19.10092764
746.39978	19.22782931
746.45526	19.35027829
746.51074	19.4716141
746.56622	19.61298701
746.6217	19.74545455
746.67719	19.88460111
746.7326	19.99480519
746.78809	20.11280148
746.84357	20.22745826
746.89905	20.34768089
746.95447	20.46790353
747.00995	20.58589981
747.06537	20.71391466
747.12085	20.83970315
747.17627	20.95769944
747.23175	21.08571429
747.28717	21.20816327
747.34259	21.33951763
747.39801	21.47755102
747.45349	21.61892393
747.50891	21.76586271
747.56433	21.91057514
747.61975	22.06085343
747.67517	22.21001855
747.73059	22.37365492
747.78595	22.54174397
747.84137	22.70426716
747.89679	22.85565863
747.95221	23.01261596
748.00757	23.17959184
748.06299	23.34768089
748.11835	23.52133581
748.17377	23.69053803
748.22913	23.85640074
748.28455	24.02894249
748.3399	24.20927644
748.39526	24.39294991
748.45062	24.58998145
748.50604	24.80705009
748.5614	25.03636364
748.61676	25.27346939
748.67212	25.53729128
748.72748	25.80333952
748.78284	26.07717996
748.83813	26.34434137
748.89349	26.61595547
748.94885	26.88311688
749.00421	27.16029685
749.05951	27.44749536
749.11487	27.73692022
749.17017	28.02411874
749.22552	28.31020408
749.28082	28.58070501
749.33618	28.86456401
749.39148	29.16178108
749.44678	29.4890538
749.50208	29.81966605
749.55743	30.16252319
749.61273	30.4987013
749.66803	30.82931354
749.72333	31.17105751
749.77863	31.51280148
749.83386	31.84897959
749.88916	32.20185529
749.94446	32.53358071
749.99976	32.86085343
750.05499	33.18033395
750.11029	33.49647495
750.16559	33.81150278
750.22083	34.14211503
750.27612	34.47272727
750.33136	34.81113173
750.3866	35.15955473
750.44189	35.51910946
750.49713	35.87866419
750.55237	36.2471243
750.6076	36.6244898
750.66284	36.99628942
750.71808	37.3825603
750.77332	37.78218924
750.82855	38.18627087
750.88379	38.61706865
750.93903	39.03784787
750.99426	39.45751391
751.04944	39.86938776
751.10468	40.28348794
751.15985	40.70649351
751.21509	41.12615955
751.27026	41.56029685
751.3255	41.97773655
751.38068	42.36957328
751.43591	42.75250464
751.49109	43.12096475
751.54626	43.50166976
751.60144	43.89350649
751.65662	44.29981447
751.71179	44.70500928
751.76697	45.10352505
751.82214	45.50871985
751.87732	45.93172542
751.9325	46.36029685
751.98767	46.81558442
752.04285	47.29090909
752.09796	47.75398887
752.15314	48.19480519
752.20825	48.6244898
752.26343	49.0541744
752.31854	49.4961039
752.37372	49.94693878
752.42883	50.39888683
752.48395	50.83079777
752.53912	51.29276438
752.59424	51.73024119
752.64935	52.17439703
752.70447	52.62745826
752.75958	53.10055659
752.8147	53.5825603
752.86981	54.05788497
752.92493	54.51985158
752.97998	54.98404453
753.0351	55.44935065
753.09021	55.91576994
753.14532	56.35881262
753.20038	56.81076067
753.25549	57.26270872
753.31055	57.73246753
753.3656	58.22226345
753.42072	58.71985158
753.47577	59.23858998
753.53082	59.76289425
753.58594	60.283859
753.64099	60.81706865
753.69604	61.3580705
753.7511	61.91688312
753.80615	62.49239332
753.86121	63.06011132
753.91626	63.6244898
753.97125	64.17884972
754.02631	64.74434137
754.08136	65.30649351
754.13635	65.86864564
754.19141	66.43302412
754.24646	67.00074212
754.30145	67.57736549
754.35645	68.14730983
754.4115	68.72615955
754.46649	69.32727273
754.52148	69.93840445
754.57654	70.54953618
754.63153	71.17513915
754.68652	71.82077922
754.74152	72.46085343
754.79651	73.12430427
754.8515	73.80890538
754.90649	74.52356215
754.96143	75.2471243
755.01642	75.9729128
755.07141	76.70092764
755.12634	77.43450835
755.18134	78.18478664
755.23633	78.91948052
755.29126	79.67532468
755.34619	80.46122449
755.40118	81.28051948
755.45612	82.0987013
755.51105	82.91131725
755.56598	83.74730983
755.62097	84.61113173
755.6759	85.483859
755.73083	86.35324675
755.78577	87.24155844
755.8407	88.14990724
755.89557	89.05825603
755.9505	89.97439703
756.00543	90.87384045
756.06036	91.77884972
756.11523	92.68051948
756.17017	93.55881262
756.22504	94.43487941
756.27997	95.33543599
756.33484	96.26604824
756.38977	97.20890538
756.44464	98.1729128
756.49951	99.14248609
756.55438	100.1432282
756.60925	101.1684601
756.66418	102.2048237
756.71906	103.2545455
756.77393	104.3532468
756.82874	105.4730983
756.88361	106.5851577
756.93848	107.709462
756.99335	108.819295
757.04816	109.9191095
757.10303	111.0111317
757.1579	112.096475
757.21271	113.1840445
757.26758	114.2716141
757.32239	115.3480519
757.3772	116.3977737
757.43207	117.470872
757.48688	118.5573284
757.54169	119.6526902
757.5965	120.7591837
757.65131	121.8745826
757.70612	123.0200371
757.76093	124.1666048
757.81573	125.2998145
757.87054	126.4486085
757.92535	127.6397032
757.9801	128.8686456
758.03491	130.0630798
758.08966	131.2730983
758.14447	132.4920223
758.19922	133.7298701
758.25403	134.9710575
758.30878	136.2
758.36359	137.4500928
758.41833	138.7369202
758.47308	140.0270872
758.52783	141.3250464
758.58258	142.6285714
758.63733	143.9532468
758.69208	145.2879406
758.74683	146.6137291
758.80157	147.9439703
758.85632	149.2909091
758.91107	150.6367347
758.96576	151.9491651
759.02051	153.2671614
759.0752	154.5962894
759.12994	155.8987013
759.18463	157.1788497
759.23938	158.4667904
759.29407	159.7435993
759.34875	161.0337662
759.4035	162.32282
759.45819	163.5962894
759.51288	164.8753247
759.56757	166.206679
759.62225	167.5213358
759.67694	168.8671614
759.73163	170.2808905
759.78632	171.7313544
759.84094	173.1829314
759.89563	174.638961
759.95032	176.109462
760.00494	177.5988868
760.05963	179.1339518
760.11426	180.6879406
760.16895	182.2285714
760.22357	183.7792208
760.2782	185.3131725
760.33289	186.8293135
760.38751	188.3432282
760.44214	189.909462
760.49677	191.5068646
760.55139	193.1120594
760.60602	194.7038961
760.66064	196.264564
760.71527	197.8397032
760.76984	199.4181818
760.82446	201.0077922
760.87909	202.6218924
760.93365	204.2604824
760.98828	205.9358071
761.04285	207.6044527
761.09747	209.2730983
761.15204	210.9539889
761.20667	212.6805195
761.26123	214.451577
761.3158	216.2437848
761.37036	218.0526902
761.42493	219.8860853
761.47949	221.7439703
761.53406	223.6296846
761.58862	225.5332096
761.64319	227.4434137
761.69775	229.3358071
761.75226	231.2359926
761.80682	233.1428571
761.86139	235.077551
761.91589	237.0289425
761.97046	239.025974
762.02496	241.0508349
762.07953	243.0745826
762.13403	245.1061224
762.18854	247.1632653
762.24304	249.2181818
762.29755	251.3120594
762.35211	253.4025974
762.40662	255.5064935
762.46112	257.5825603
762.51556	259.6597403
762.57007	261.6879406
762.62457	263.7139147
762.67908	265.7643785
762.73352	267.7892393
762.78802	269.7795918
762.84253	271.8022263
762.89697	273.8615955
762.95148	275.9554731
763.00592	278.0716141
763.06036	280.2166976
763.11487	282.3651206
763.16931	284.580334
763.22375	286.8434137
763.2782	289.1209647
763.33264	291.4586271
763.38708	293.8296846
763.44153	296.2107607
763.49597	298.6185529
763.55035	301.0141002
763.6048	303.3606679
763.65924	305.7105751
763.71362	308.0961039
763.76807	310.5083488
763.82245	312.9139147
763.87689	315.2927644
763.93127	317.6549165
763.98572	320.0437848
764.0401	322.4883117
764.09448	324.9884972
764.14886	327.574397
764.20325	330.2337662
764.25763	332.9131725
764.31201	335.6671614
764.36639	338.4411874
764.42078	341.2374768
764.47516	344.1283859
764.52948	347.1105751
764.58386	350.1651206
764.63824	353.2497217
764.69257	356.3521336
764.74695	359.4890538
764.80127	362.6883117
764.85559	366.0011132
764.90997	369.309462
764.96429	372.6846011
765.01862	376.135436
765.07294	379.6163265
765.12726	383.1840445
765.18158	386.7996289
765.2359	390.4842301
765.29022	394.1866419
765.34454	397.9714286
765.39886	401.8530612
765.45313	405.7814471
765.50745	409.7320965
765.56177	413.7105751
765.61603	417.7380334
765.67035	421.8089054
765.72461	425.8641929
765.77887	429.9517625
765.83319	434.0549165
765.88745	438.1970315
765.94171	442.3513915
765.99597	446.4556586
766.05023	450.5877551
766.10449	454.8233766
766.15875	459.1402597
766.21301	463.541744
766.26727	468.0879406
766.32147	472.7076067
766.37573	477.3851577
766.42999	482.141744
766.48419	487.0419295
766.53845	492.0489796
766.59265	497.1528757
766.64685	502.2946197
766.70111	507.470872
766.75531	512.651577
766.80951	517.8122449
766.86371	522.9361781
766.91791	528.0790353
766.97211	533.2274583
767.02631	538.4371058
767.08051	543.6723562
767.1347	548.8608534
767.1889	554.1105751
767.2431	559.3970315
767.29724	564.7012987
767.35144	570.0834879
767.40558	575.5569573
767.45978	581.0615955
767.51392	586.5640074
767.56805	592.174397
767.62225	597.8315399
767.67639	603.5198516
767.73053	609.2961039
767.78467	615.071243
767.83881	620.8541744
767.89294	626.6816327
767.94708	632.5024119
768.00122	638.2697588
768.05536	644.0894249
768.10944	650.0593692
768.16357	656.1439703
768.21771	662.2274583
768.27179	668.4445269
768.32593	674.7495362
768.38	681.219295
768.43414	687.8359926
768.48822	694.6163265
768.5423	701.5146568
768.59637	708.5910946
768.65045	715.8411874
768.70453	723.1725417
768.75861	730.5372913
768.81268	737.9465677
768.86676	745.3391466
768.92084	752.7539889
768.97491	760.1309833
769.02893	767.6048237
769.08301	775.1543599
769.13708	782.6916512
769.1911	790.142115
769.24518	797.5725417
769.29919	805.0263451
769.35321	812.4077922
769.40723	819.8961039
769.4613	827.4567718
769.51532	835.0897959
769.56934	842.8241187
769.62335	850.5450835
769.67737	858.1758813
769.73138	865.9046382
769.78534	873.8615955
769.83936	881.9387755
769.89337	890.1083488
769.94739	898.4181818
770.00134	906.7692022
770.05536	915.0445269
770.10931	923.3198516
770.16327	931.7109462
770.21729	940.2233766
770.27124	948.9528757
770.3252	957.8204082
770.37915	966.8025974
770.43311	975.9150278
770.48706	985.2556586
770.54102	994.7532468
770.59497	1004.412245
770.64893	1014.428571
770.70288	1024.637477
770.75684	1034.932096
770.81073	1045.212245
770.86469	1055.503525
770.91858	1065.792579
770.97253	1076.066048
771.02643	1086.222635
771.08032	1096.195547
771.13428	1106.035993
771.18817	1115.972171
771.24207	1125.872727
771.29596	1135.690909
771.34985	1145.513544
771.40375	1155.469759
771.45764	1165.636364
771.51154	1175.968831
771.56543	1186.491651
771.61926	1197.264935
771.67316	1208.127273
771.72699	1219.143228
771.78088	1230.129128
771.83472	1241.216327
771.88861	1252.517254
771.94244	1263.866048
771.99628	1275.430798
772.05017	1286.966605
772.104	1298.554731
772.15784	1310.1718
772.21167	1321.945826
772.2655	1333.970315
772.31934	1346.156215
772.37311	1358.475696
772.42694	1370.79295
772.48077	1383.031169
772.53461	1395.390724
772.58838	1407.656772
772.64221	1420.016327
772.69598	1432.712059
772.74976	1445.563636
772.80359	1458.263822
772.85736	1470.929499
772.91113	1483.491651
772.9649	1496.003711
773.01868	1508.44898
773.07245	1521.014471
773.12622	1533.45974
773.17999	1545.881633
773.23376	1558.281262
773.28754	1570.339147
773.34125	1582.390353
773.39502	1594.433766
773.44879	1606.444898
773.5025	1618.628571
773.55627	1630.783302
773.60999	1643.128386
773.6637	1655.660482
773.71741	1668.329499
773.77118	1681.211132
773.82489	1693.971429
773.8786	1706.688312
773.93231	1719.163636
773.98602	1731.464193
774.03967	1743.502041
774.09338	1755.144712
774.14709	1766.464564
774.20081	1777.124304
774.25446	1787.040445
774.30817	1796.249722
774.36182	1804.512801
774.41553	1812.026716
774.46918	1818.701299
774.52283	1824.587755
774.57654	1829.725046
774.63019	1833.853803
774.68384	1836.994063
774.73749	1838.915399
774.79114	1839.569944
774.84479	1838.777365
774.89838	1836.606679
774.95203	1833.192579
775.00568	1828.486085
775.05933	1822.423748
775.11292	1814.802968
775.16656	1805.503525
775.22015	1794.794805
775.2738	1782.416327
775.32739	1768.4282
775.38098	1753.125417
775.43457	1736.516883
775.48816	1718.511317
775.54175	1699.060853
775.59534	1678.029685
775.64893	1655.394434
775.70251	1631.136178
775.7561	1605.398516
775.80969	1578.202597
775.86322	1549.720965
775.91681	1520.039332
775.9704	1488.851577
776.02393	1456.391466
776.07751	1422.824861
776.13104	1388.060482
776.18457	1352.338776
776.2381	1315.661967
776.29169	1278.141373
776.34521	1239.949536
776.39874	1200.970686
776.45227	1161.408534
776.5058	1121.40334
776.55927	1081.287941
776.61279	1041.025603
776.66632	1000.567347
776.71979	960.0211503
776.77332	919.4660482
776.82684	879.1658627
776.88031	839.2263451
776.93378	799.6619666
776.9873	760.6486085
777.04077	722.2397032
777.09424	684.5009276
777.14771	647.2018553
777.20117	610.4671614
777.25464	574.4749536
777.30811	539.2797774
777.36157	505.0486085
777.41504	471.8972171
777.46851	439.8701299
777.52191	408.8927644
777.57538	378.9818182
777.62878	350.0504638
777.68225	322.1788497
777.73566	295.6441558
777.78912	270.3929499
777.84253	246.3907236
777.89594	223.7710575
777.94934	202.3669759
778.00275	182.0025974
778.05615	162.8404453
778.10956	144.883859
778.16296	128.1717996
778.21637	112.9179963
778.26978	99.19146568
778.32312	86.92319109
778.37653	76.16660482
778.42993	66.86270872
778.48328	58.93135436
778.53662	52.35473098
778.59003	47.19294991
778.64337	43.22560297
778.69672	40.38701299
778.75012	38.5825603
778.80347	37.57847866
778.85681	37.1554731
778.91016	37.17884972
778.96344	37.52504638
779.01678	38.13061224
779.07013	38.87087199
779.12347	39.65565863
779.17676	40.40037106
779.2301	41.0716141
779.28339	41.6593692
779.33673	42.13135436
779.39001	42.49090909
779.44336	42.75584416
779.49664	42.95732839
779.54993	43.09536178
779.60321	43.18998145
779.65649	43.24675325
779.70978	43.28682746
779.76306	43.31020408
779.81635	43.30463822
779.86963	43.27903525
779.92285	43.24897959
779.97614	43.23005566
780.02942	43.20222635
780.08264	43.16660482
780.13586	43.12764378
780.18915	43.07643785
780.24237	43.01187384
780.29559	42.93729128
780.34888	42.85491651
780.4021	42.78144712
780.45532	42.69795918
780.50854	42.61001855
780.56177	42.50092764
780.61493	42.38293135
780.66815	42.25602968
780.72137	42.09573284
780.7746	41.85306122
780.82776	41.5012987
780.88098	40.9825603
780.93414	40.26233766
780.9873	39.32170686
781.04053	38.15398887
781.09369	36.70575139
781.14685	34.99814471
781.20001	33.00556586
781.25317	30.77699443
781.30634	28.37254174
781.3595	25.8445269
781.41266	23.26753247
781.46582	20.72170686
781.51898	18.28719852
781.57208	15.9974026
781.62524	13.86790353
781.67834	11.9877551
781.73151	10.33914657
781.78461	8.965491651
781.83771	7.814471243
781.89087	6.861595547
781.94397	6.100185529
781.99707	5.512430427
782.05017	5.056029685
782.10327	4.694248609
782.15637	4.41038961
782.20947	4.196660482
782.26251	4.009647495
782.31561	3.847124304
782.36871	3.701298701
782.42175	3.588868275
782.47485	3.498701299
782.52789	3.426345083
782.58099	3.34174397
782.63403	3.270500928
782.68707	3.203710575
782.74011	3.136920223
782.79315	3.072356215
782.84619	3.017810761
782.89923	2.983302412
782.95227	2.948794063
783.00531	2.900927644
783.05835	2.85528757
783.11139	2.817439703
783.16437	2.788497217
783.21741	2.753988868
783.27039	2.702782931
783.32343	2.635992579
783.3764	2.568089054
783.42938	2.499072356
783.48242	2.421150278
783.5354	2.365491651
783.58838	2.315398887
783.64136	2.266419295
783.69434	2.224118738
783.74731	2.18961039
783.80023	2.168460111
783.85321	2.159554731
783.90619	2.161781076
783.95911	2.172912801
784.01208	2.184044527
784.065	2.18961039
784.11798	2.182931354
784.1709	2.187384045
784.22382	2.19406308
784.27679	2.180705009
784.32971	2.159554731
784.38263	2.131725417
784.43555	2.109461967
784.48846	2.097217069
784.54138	2.096103896
784.59424	2.086085343
784.64716	2.086085343
784.70007	2.089424861
784.75293	2.097217069
784.80585	2.096103896
784.8587	2.115027829
784.91162	2.143970315
784.96448	2.192949907
785.01733	2.234137291
785.07019	2.254174397
785.12305	2.26419295
785.1759	2.283116883
785.22876	2.296474954
785.28162	2.305380334
785.33447	2.303153989
785.38733	2.313172542
785.44019	2.314285714
785.49298	2.302040816
785.54584	2.271985158
785.59863	2.254174397
785.65149	2.25974026
785.70428	2.26864564
785.75708	2.289795918
785.80994	2.306493506
785.86273	2.327643785
785.91553	2.353246753
785.96832	2.373283859
786.02112	2.393692022
786.07391	2.425815001
786.12665	2.422030215
786.17944	2.400137821
786.23224	2.353384575
786.28497	2.350240398
786.33777	2.340756133
786.3905	2.313899124
786.4433	2.285752296
786.49603	2.258914419
786.54877	2.243917164
786.6015	2.252141002
786.6543	2.263014561
786.70703	2.264733976
786.75977	2.279856695
786.81244	2.309341029
786.86517	2.310815584
786.91791	2.255629588
786.97064	2.254867038
787.02332	2.251073137
787.07605	2.252803667
787.12872	2.258632035
787.18146	2.329190809
787.23413	2.385737898
787.2868	2.218932179
787.33954	1.980185529
787.39221	1.637714286
787.44489	0.853333333
787.49756	0
